# Supplementary material
Source: MDPI journal article supplement (https://www.mdpi.com/2077-0472/11/5/401)
Supplement: s1 [file s1]

**Table S1.** Primer sequences used for RT-qPCR in this study.

| Marker         | Forward Sequence (5'-3') | Reverse Sequence (5'-3') |
|----------------|--------------------------|--------------------------|
| <i>GLuRS</i>   | GCTCTCCGCTCAAGTGAATACC   | GATCAGTCCAGTCCTCCACCTT   |
| <i>ALAD</i>    | GGCATGGGCTTCTTGATGAGG    | CCAGAGCAACATCCGTGTAGAC   |
| <i>PBGD</i>    | GAAGGATTGACATTGCCGTCCA   | GTCTACGCAGAGAAGCACTTCC   |
| <i>UROD</i>    | GACGGCGTCATCCTGTTCTC     | TGCGTAGAATCTTGAGCGACTC   |
| <i>CPOX</i>    | AAGCACCGTAATGAGCGTCG     | TCAGTTGTTGCCATGCCTTGT    |
| <i>POR</i>     | TCATCCTCGGCTCCATCACC     | CTCCTGCATCGTCAGCATGTT    |
| <i>DVR</i>     | CAGGTTCAATCAAGGTGCCGAT   | CGTCATCTCGTCGCTGTACTC    |
| <i>CAO</i>     | GCATGGACTTCTGCTGGACAA    | AGATGCCAGTGGTTGACAAGAC   |
| <i>HCBR</i>    | GCAGGAAGCAAGACATGGATGA   | GCATTGGAGCAAGCCTGTCA     |
| <i>CHLG</i>    | GGGCACTGTTGTTAGCAGGG     | GCCAATGTAGCTCGCACCAA     |
| <i>NOL</i>     | CACTGCTTCTCCTGGAATGGTC   | GCAAGATCCTTGGTGGTGTCAA   |
| <i>MgCH</i>    | AAGATGGTTGCCGAAGTGGATG   | ATGTCCTGGAGCTGCTTCTCA    |
| <i>UBQ10</i> * | CTCATCTCCTCTCCTCGCATCA   | CCACCAATCGGATCTAGCAACA   |

\* Reference gene.

**Table S2.** Summary of genome mapping.

| Sample      | Total Clean Reads | Total Mapping Ratio [%] | Uniquely Mapping Ratio [%] * |
|-------------|-------------------|-------------------------|------------------------------|
| <i>ch11</i> | 29,328,341        | 97.93                   | 90.26                        |
| Wild-type   | 25,306,787        | 96.84                   | 89.16                        |

\* Unique mapping ratio: Percentage of reads that map to only one location in the reference genome. *ch11*, chlorophyll *b*-deficient mutant.

**Table S3.** Summary of gene mapping ratio.

| Sample      | Total Clean Reads | Total Mapping Ratio [%] | Uniquely Mapping Ratio [%] * |
|-------------|-------------------|-------------------------|------------------------------|
| <i>ch11</i> | 28,328,341        | 89.67                   | 80.42                        |
| Wild-type   | 25,306,787        | 88.93                   | 79.56                        |

\* Unique mapping ratio: The percentage of uniquely mapped reads. *ch11*, chlorophyll *b*-deficient mutant.
